# Supplementary material
Source: PubMed Central journal article supplement (PMC4214757)

**Table S1 - DNA sequencing results.** DNA sequencing results for ccf-DNA isolated from CLL blood samples by DEP and ccf-DNA isolated from the same CLL patient plasma samples by DEP process compared with the results obtained using an established method performed on genomic DNA obtained from CLL patient leukemic B-cells.

| ID      | DEP blood     |                   | DEP plasma         |                   | Genomic DNA     |                   |
|---------|---------------|-------------------|--------------------|-------------------|-----------------|-------------------|
|         | V-gene/allele | V-region<br>ID, % | V-gene/allele      | V-region<br>ID, % | V-region/allele | V-region<br>ID, % |
| CLL-1e  | IGHV3-30*03 F | 95.14             | IGHV3-30*03 F      | 95.14             | IGHV3-30*03 F   | 95.14             |
| CLL-2e  | IGHV1-2*02 F  | 100.00            | IGHV1-69*01 F      | 84.03             | IGHV1-2*02 F    | 100.00            |
| CLL-3e  | IGHV4-4*07 F  | 100.00            | IGHV4-4*07 F       | 97.89             | IGHV4-4*07 F    | 100.00            |
| CLL-4e  | IGHV1-8*01 F  | 100.00            | No productive gene |                   | IGHV1-8*01 F    | 100.00            |
| CLL-5e  | IGHV3-21*02 F | 88.19             | IGHV3-21*02 F      | 88.19             | IGHV3-21*02 F   | 88.19             |
| CLL-6e  | IGHV3-33*01 F | 94.10             | IGHV3-33*01 F      | 94.10             | IGHV3-33*01 F   | 94.10             |
| CLL-7e  | IGHV3-53*04 F | 97.19             | IGHV3-53*04 F      | 97.19             | IGHV3-53*04 F   | 97.19             |
| CLL-8e  | IGHV3-64*01 F | 94.79             | IGHV3-64*01 F      | 94.79             | IGHV3-64*01 F   | 94.79             |
| CLL-9e  | IGHV4-39*01 F | 96.91             | IGHV4-39*01 F      | 96.91             | IGHV4-39*01 F   | 96.91             |
| CLL-10e | IGHV4-34*01 F | 99.30             | IGHV4-34*01 F      | 99.30             | IGHV4-34*01 F   | 99.30             |
| CLL-11e | IGHV4-39*01 F | 100.00            | IGHV4-39*01 F      | 100.00            | IGVH4-39*01 F   | 100.00            |

**Figure S1 – Standard Curve for PicoGreen Assay.** A standard curve was constructed using lambda DNA at concentrations of 0.5 ng/mL, 5 ng/mL, 50 ng/mL, and 500 ng/mL. The fluorescence value of the reagent blank was subtracted from that of each of the samples. Corrected data was used to generate a standard curve of fluorescence versus DNA concentration.

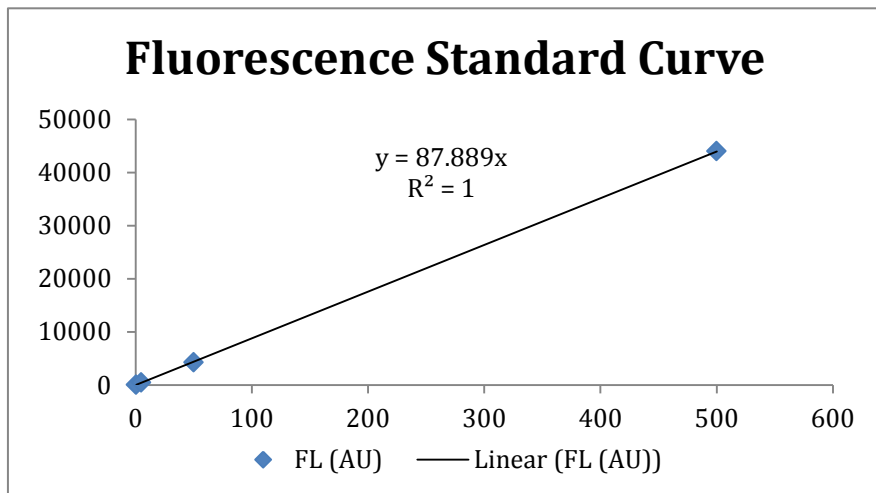

Supplement: NIHMS609497-supplement-Supplementary_Data.pdf [file NIHMS609497-supplement-Supplementary_Data.pdf]
